# Supplementary material
Source: PubMed Central journal article supplement (PMC149207)
Supplement: nar_31_3_850__1.pdf [file nar_31_3_850__1.pdf]

## LEGEND TO FIGURE

**Probing gels of nucleotides 120 to 230 of wild type, 2L, 2R, and 2LR vRNAs with DMS.** Lanes marked 0, 1, and 2 correspond to a mock reaction without DMS and modification for 5 and 10 min, respectively. Lanes ACGU correspond to sequencing reactions with ddTTP, ddGTP, ddCTP, and ddATP, respectively. Labels on the left and on the right hand side of the gels are shifted by one nucleotide to account for the fact that reverse transcriptase was blocked one nucleotide 3' from the modified bases. Nucleotides whose reactivity was modified in a mutant, as compared to the wild type RNA, are indicated in red. Those that are absent in the wild type RNA are indicated by green labels. The continuous and dashed green lines on the left of the gels indicate the substitutions and their complementary sequences, respectively.

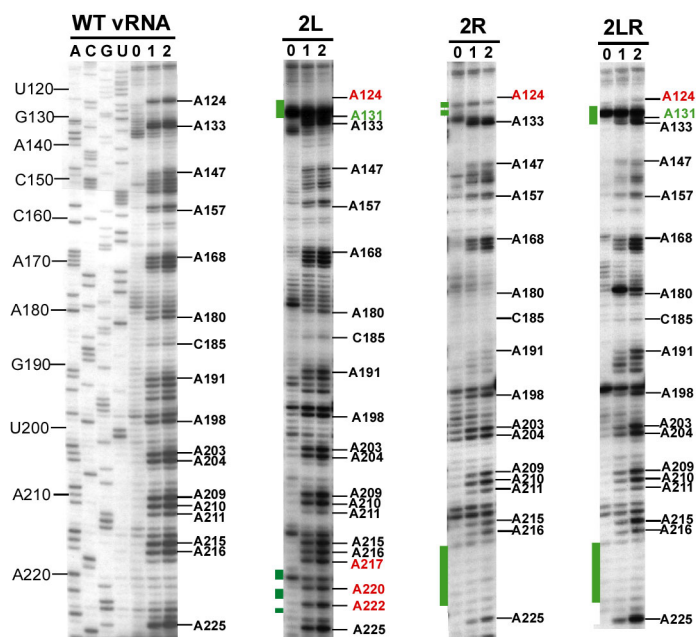

Goldschmidt et al. Supplementary Figure
